# Supplementary material
Source: ML conference proceedings conference paper supplement (https://openaccess.thecvf.com/content/WACV2024/html/Yoo_Real-Time_Polyp_Detection_WACV_2024_paper.html)
Supplement: Supplementary file 1 [file Yoo_Real-Time_Polyp_Detection_WACV_2024_supplemental.pdf]

# Real-Time Polyp Detection in Colonoscopy using Lightweight Transformer: Supplementary Material

Youngbeom Yoo<sup>1,\*</sup>, Jae Young Lee<sup>1,\*</sup>, Dong-Jae Lee<sup>1</sup>, Jiwoon Jeon<sup>2</sup>, and Junmo Kim<sup>1</sup>

<sup>1</sup>School of Electrical Engineering, KAIST, South Korea

bum8552@hufs.ac.kr, {mcneato, jhtwosun, junmo.kim}@kaist.ac.kr

<sup>2</sup>AINex, South Korea jiwoon.jeon@ainex.io

## 1. Detection Results

Fig. 1 presents a comparison of inference result examples at an image size of 320 using the YOLOv5m [2] and the proposed YOLOv5m-TST models on the SUN dataset [6]. Fig. 2 presents a comparison of inference result examples at an image size of 320 using the YOLOv5m and the proposed YOLOv5m-TST models on the KUMC dataset [5]. Fig. 3 presents a comparison of inference result examples at an image size of 320 using the YOLOv5m and the proposed YOLOv5m-TST models on the Kvasir dataset [1]. We can observe that our proposed method demonstrates more robust performance compared

\*equal contribution



Figure 1. Detection results on the SUN dataset [6] of YOLOv5m [2] and YOLOv5m-TST (Ours) with an image size of 320. The red and blue boxes signify the prediction results and ground truth, respectively.



Figure 2. Detection results on the KUMC dataset [1] of YOLOv5m [2] and YOLOv5m-TST (Ours) with an image size of 320. The red and blue boxes signify the prediction results and ground truth, respectively.



Figure 3. Detection results on the Kvasir dataset [5] of YOLOv5m [2] and YOLOv5m-TST (Ours) with an image size of 320. The red and blue boxes signify the prediction results and ground truth, respectively.

to the YOLOv5m in cases of small polyps, polyps with shadows, situations where the frame is dark, or when the polyps are partially occluded.

| # Fold      | Model         | 320           |               |               |               |               |               | 384           |               |               |               |               |               | 480           |               |               |               |               |               |
|-------------|---------------|---------------|---------------|---------------|---------------|---------------|---------------|---------------|---------------|---------------|---------------|---------------|---------------|---------------|---------------|---------------|---------------|---------------|---------------|
|             |               | Precision     | Recall        | F1            | mAP25         | mAP50         | mAP50-95      | Precision     | Recall        | F1            | mAP25         | mAP50         | mAP50-95      | Precision     | Recall        | F1            | mAP25         | mAP50         | mAP50-95      |
| 1           | YOLOv5s       | 0.9580        | <b>0.9028</b> | 0.9295        | <b>0.9518</b> | <b>0.9398</b> | <b>0.6001</b> | <b>0.9597</b> | <b>0.9124</b> | <b>0.9354</b> | <b>0.9545</b> | <b>0.9430</b> | 0.6131        | <b>0.9674</b> | <b>0.9080</b> | <b>0.9367</b> | <b>0.9555</b> | <b>0.9454</b> | <b>0.7300</b> |
|             | YOLOv5s-TST   | <b>0.9640</b> | 0.9010        | <b>0.9314</b> | 0.9512        | 0.9381        | 0.5842        | 0.9502        | 0.8997        | 0.9243        | 0.9479        | 0.9347        | <b>0.6766</b> | 0.9425        | 0.8931        | 0.9171        | 0.9458        | 0.9294        | 0.6794        |
|             | YOLOv5m       | <b>0.9636</b> | 0.8941        | 0.9275        | 0.9457        | 0.9318        | 0.6010        | <b>0.9686</b> | 0.9028        | 0.9345        | 0.9494        | 0.9409        | <b>0.6246</b> | <b>0.9715</b> | 0.8972        | 0.9329        | 0.9513        | 0.9403        | <b>0.6177</b> |
|             | YOLOv5m-TST   | 0.9623        | <b>0.9135</b> | <b>0.9373</b> | <b>0.9590</b> | <b>0.9488</b> | <b>0.6124</b> | 0.9553        | <b>0.9153</b> | <b>0.9349</b> | <b>0.9580</b> | <b>0.9486</b> | 0.6130        | 0.9647        | <b>0.9170</b> | <b>0.9403</b> | <b>0.9598</b> | <b>0.9512</b> | 0.6164        |
|             | YOLOv5l       | <b>0.9664</b> | 0.8993        | 0.9316        | 0.9480        | 0.9384        | <b>0.6220</b> | <b>0.9667</b> | 0.9057        | 0.9352        | 0.9532        | 0.9442        | <b>0.6368</b> | 0.9561        | <b>0.9216</b> | 0.9386        | <b>0.9634</b> | <b>0.9552</b> | <b>0.6351</b> |
| YOLOv5l-TST | 0.9663        | <b>0.9100</b> | <b>0.9373</b> | <b>0.9613</b> | <b>0.9506</b> | 0.6157        | 0.9659        | <b>0.9223</b> | <b>0.9436</b> | <b>0.9653</b> | <b>0.9572</b> | 0.6287        | <b>0.9754</b> | 0.9089        | <b>0.9410</b> | 0.9547        | 0.9451        | 0.6346        |               |
| 2           | YOLOv5s       | <b>0.9245</b> | 0.8441        | <b>0.8825</b> | <b>0.9203</b> | <b>0.8785</b> | <b>0.5361</b> | <b>0.9128</b> | 0.8572        | <b>0.8842</b> | <b>0.9242</b> | <b>0.8816</b> | <b>0.5493</b> | <b>0.9238</b> | 0.8489        | <b>0.8847</b> | <b>0.9245</b> | <b>0.8890</b> | <b>0.5505</b> |
|             | YOLOv5s-TST   | 0.9092        | <b>0.8546</b> | 0.8810        | 0.9198        | 0.8710        | 0.5183        | 0.9109        | <b>0.8579</b> | 0.8436        | 0.9181        | 0.8716        | 0.5158        | 0.9016        | <b>0.8569</b> | 0.8787        | 0.9191        | 0.8673        | 0.5190        |
|             | YOLOv5m       | <b>0.9316</b> | 0.8309        | 0.8784        | 0.9069        | 0.8672        | <b>0.5334</b> | <b>0.9334</b> | 0.8222        | 0.8743        | 0.9064        | 0.8670        | <b>0.5415</b> | <b>0.9341</b> | 0.8590        | <b>0.8950</b> | <b>0.9301</b> | <b>0.8897</b> | <b>0.5569</b> |
|             | YOLOv5m-TST   | 0.9244        | <b>0.8607</b> | <b>0.8914</b> | <b>0.9256</b> | <b>0.8777</b> | 0.5262        | 0.9130        | <b>0.8686</b> | <b>0.8902</b> | <b>0.9285</b> | <b>0.8897</b> | 0.5406        | 0.9246        | <b>0.8622</b> | 0.8923        | 0.9280        | 0.8877        | 0.5482        |
|             | YOLOv5l       | <b>0.9193</b> | 0.8443        | 0.8802        | 0.9117        | 0.8770        | <b>0.5500</b> | 0.9284        | 0.8356        | 0.8795        | 0.9101        | 0.8683        | <b>0.5543</b> | <b>0.9337</b> | 0.8359        | 0.8821        | 0.9176        | 0.8786        | <b>0.5608</b> |
| YOLOv5l-TST | 0.9180        | <b>0.8658</b> | <b>0.8911</b> | <b>0.9290</b> | <b>0.8852</b> | 0.5398        | <b>0.9331</b> | <b>0.8670</b> | <b>0.8989</b> | <b>0.9333</b> | <b>0.8891</b> | 0.5456        | 0.9126        | <b>0.8780</b> | <b>0.8950</b> | <b>0.9389</b> | <b>0.8941</b> | 0.5467        |               |
| 3           | YOLOv5s       | <b>0.9157</b> | 0.8508        | 0.8821        | <b>0.9245</b> | <b>0.8660</b> | <b>0.5654</b> | <b>0.9342</b> | <b>0.8603</b> | <b>0.8957</b> | <b>0.9348</b> | <b>0.8832</b> | <b>0.5351</b> | <b>0.9198</b> | <b>0.8608</b> | <b>0.8894</b> | <b>0.9279</b> | <b>0.8806</b> | <b>0.5411</b> |
|             | YOLOv5s-TST   | 0.9075        | <b>0.8615</b> | <b>0.8839</b> | 0.9221        | 0.8646        | 0.5015        | 0.9022        | 0.8475        | 0.8740        | 0.9178        | 0.8690        | 0.5136        | 0.8844        | <b>0.8524</b> | 0.8681        | 0.9150        | 0.8661        | 0.5044        |
|             | YOLOv5m       | 0.9158        | 0.8538        | 0.8837        | 0.9226        | 0.8757        | <b>0.5386</b> | <b>0.9229</b> | 0.8542        | <b>0.8872</b> | 0.9173        | 0.8688        | <b>0.5316</b> | <b>0.9326</b> | 0.8491        | <b>0.8889</b> | 0.9261        | 0.8715        | 0.5407        |
|             | YOLOv5m-TST   | <b>0.9257</b> | <b>0.8249</b> | <b>0.8898</b> | <b>0.9330</b> | <b>0.8866</b> | 0.5288        | 0.8993        | <b>0.8657</b> | <b>0.8822</b> | <b>0.9241</b> | <b>0.8768</b> | 0.5310        | 0.9137        | <b>0.8634</b> | 0.8878        | <b>0.9297</b> | <b>0.8918</b> | <b>0.5477</b> |
|             | YOLOv5l       | <b>0.9361</b> | 0.8600        | <b>0.8965</b> | 0.9331        | <b>0.8872</b> | <b>0.5551</b> | <b>0.9352</b> | 0.8667        | 0.8997        | 0.9352        | 0.8774        | <b>0.5440</b> | <b>0.9349</b> | 0.8628        | <b>0.8974</b> | <b>0.9310</b> | 0.8687        | <b>0.5500</b> |
| YOLOv5l-TST | 0.9299        | <b>0.8645</b> | <b>0.8968</b> | <b>0.9351</b> | 0.8806        | 0.5355        | 0.9242        | <b>0.8806</b> | <b>0.9019</b> | <b>0.9412</b> | <b>0.8876</b> | 0.5390        | 0.8974        | <b>0.8692</b> | 0.8831        | 0.9290        | <b>0.8854</b> | 0.5446        |               |
| 4           | YOLOv5s       | <b>0.9103</b> | 0.8181        | 0.8617        | <b>0.8956</b> | <b>0.8527</b> | <b>0.5085</b> | <b>0.9280</b> | <b>0.8194</b> | <b>0.8703</b> | <b>0.9109</b> | <b>0.8680</b> | <b>0.5247</b> | <b>0.9278</b> | <b>0.8302</b> | <b>0.8763</b> | <b>0.9148</b> | <b>0.8739</b> | <b>0.5329</b> |
|             | YOLOv5s-TST   | 0.9079        | <b>0.8249</b> | <b>0.8644</b> | 0.8938        | 0.8457        | 0.4918        | 0.9041        | 0.8005        | 0.8422        | 0.8830        | 0.8387        | 0.4912        | 0.9004        | 0.8042        | 0.8495        | 0.8927        | 0.8436        | 0.4895        |
|             | YOLOv5m       | 0.9170        | 0.7878        | 0.8475        | 0.8811        | 0.8372        | 0.5166        | <b>0.9240</b> | 0.8017        | 0.8586        | 0.8928        | 0.8554        | 0.5197        | 0.9136        | 0.8048        | 0.8558        | 0.8952        | 0.8605        | 0.5328        |
|             | YOLOv5m-TST   | <b>0.9193</b> | <b>0.8294</b> | <b>0.8720</b> | <b>0.9108</b> | <b>0.8717</b> | <b>0.5206</b> | <b>0.9240</b> | <b>0.8529</b> | <b>0.8869</b> | <b>0.9200</b> | <b>0.8822</b> | <b>0.5341</b> | <b>0.9186</b> | <b>0.8428</b> | <b>0.8786</b> | <b>0.9192</b> | <b>0.8810</b> | <b>0.5349</b> |
|             | YOLOv5l       | 0.9023        | 0.7981        | 0.8470        | 0.8847        | 0.8472        | 0.5207        | 0.9201        | 0.8120        | 0.8627        | 0.8954        | 0.8552        | 0.5315        | <b>0.9309</b> | 0.8215        | 0.8728        | 0.9022        | 0.8642        | <b>0.5420</b> |
| YOLOv5l-TST | <b>0.9173</b> | <b>0.8379</b> | <b>0.8758</b> | <b>0.9209</b> | <b>0.8734</b> | <b>0.5268</b> | <b>0.9290</b> | <b>0.8560</b> | <b>0.8910</b> | <b>0.9250</b> | <b>0.8825</b> | <b>0.5356</b> | 0.9225        | <b>0.8399</b> | <b>0.8793</b> | <b>0.9159</b> | <b>0.8874</b> | 0.5358        |               |
| 5           | YOLOv5s       | <b>0.9389</b> | 0.8202        | 0.8756        | <b>0.9112</b> | 0.8630        | 0.5220        | <b>0.9438</b> | 0.8171        | <b>0.8759</b> | <b>0.9109</b> | <b>0.8687</b> | <b>0.5437</b> | <b>0.9304</b> | <b>0.8233</b> | <b>0.8736</b> | <b>0.9103</b> | <b>0.8701</b> | <b>0.5474</b> |
|             | YOLOv5s-TST   | 0.9282        | <b>0.8363</b> | <b>0.8799</b> | 0.9061        | <b>0.8673</b> | <b>0.5256</b> | 0.9343        | <b>0.8181</b> | <b>0.8724</b> | 0.9007        | 0.8587        | 0.5253        | 0.9203        | 0.8126        | 0.8631        | 0.8962        | 0.8436        | 0.5149        |
|             | YOLOv5m       | 0.9231        | 0.7978        | 0.8559        | 0.8846        | 0.8443        | 0.5303        | <b>0.9533</b> | 0.8065        | 0.8738        | 0.8929        | 0.8572        | <b>0.5424</b> | 0.9388        | 0.8135        | 0.8717        | <b>0.9050</b> | <b>0.8625</b> | 0.5471        |
|             | YOLOv5m-TST   | <b>0.9364</b> | <b>0.8365</b> | <b>0.8837</b> | <b>0.9076</b> | <b>0.8661</b> | <b>0.5348</b> | 0.9366        | <b>0.8258</b> | <b>0.8792</b> | <b>0.9062</b> | <b>0.8610</b> | 0.5354        | <b>0.9544</b> | <b>0.8168</b> | <b>0.8802</b> | 0.8957        | <b>0.8567</b> | <b>0.5538</b> |
|             | YOLOv5l       | <b>0.9419</b> | <b>0.8228</b> | <b>0.8783</b> | <b>0.9005</b> | <b>0.8639</b> | <b>0.5468</b> | 0.9289        | 0.8167        | 0.8692        | 0.8959        | 0.8668        | 0.5477        | <b>0.9434</b> | 0.8116        | 0.8725        | 0.8959        | 0.8642        | <b>0.5572</b> |
| YOLOv5l-TST | 0.9404        | 0.8151        | 0.8733        | 0.9002        | 0.8610        | 0.5413        | <b>0.9296</b> | <b>0.8295</b> | <b>0.8767</b> | <b>0.9125</b> | <b>0.8695</b> | <b>0.5504</b> | 0.9388        | <b>0.8561</b> | <b>0.8956</b> | <b>0.9235</b> | <b>0.8771</b> | 0.5543        |               |
| Avg.        | YOLOv5s       | <b>0.9295</b> | 0.8472        | 0.8863        | <b>0.9207</b> | <b>0.8800</b> | <b>0.5464</b> | <b>0.9357</b> | <b>0.8533</b> | <b>0.8923</b> | <b>0.9271</b> | <b>0.8889</b> | <b>0.5532</b> | <b>0.9338</b> | <b>0.8542</b> | <b>0.8921</b> | <b>0.9266</b> | <b>0.8918</b> | <b>0.5804</b> |
|             | YOLOv5s-TST   | 0.9234        | <b>0.8557</b> | <b>0.8881</b> | 0.9186        | 0.8773        | 0.5243        | 0.9203        | 0.8447        | 0.8807        | 0.9135        | 0.8745        | 0.5445        | 0.9098        | 0.8426        | 0.8753        | 0.9138        | 0.8711        | 0.5414        |
|             | YOLOv5m       | 0.9302        | 0.8329        | 0.8786        | 0.9082        | 0.8712        | 0.5440        | <b>0.9404</b> | 0.8375        | 0.8857        | 0.9118        | 0.8779        | <b>0.5520</b> | <b>0.9381</b> | 0.8447        | 0.8889        | 0.9215        | 0.8849        | 0.5590        |
|             | YOLOv5m-TST   | <b>0.9366</b> | <b>0.8627</b> | <b>0.8967</b> | <b>0.9272</b> | <b>0.8902</b> | <b>0.5446</b> | 0.9256        | <b>0.8665</b> | <b>0.8947</b> | <b>0.9274</b> | <b>0.8917</b> | 0.5508        | 0.9352        | <b>0.8603</b> | <b>0.8958</b> | <b>0.9265</b> | <b>0.8937</b> | <b>0.5602</b> |
|             | YOLOv5l       | 0.9332        | 0.8449        | 0.8867        | 0.9156        | 0.8827        | <b>0.5589</b> | 0.9359        | 0.8473        | 0.8893        | 0.9180        | 0.8824        | <b>0.5629</b> | <b>0.9398</b> | 0.8507        | 0.8927        | 0.9220        | 0.8862        | <b>0.5690</b> |
| YOLOv5l-TST | <b>0.9344</b> | <b>0.8587</b> | <b>0.8947</b> | <b>0.9293</b> | <b>0.8902</b> | 0.5518        | <b>0.9364</b> | <b>0.8711</b> | <b>0.9024</b> | <b>0.9355</b> | <b>0.8972</b> | 0.5599        | 0.9293        | <b>0.8704</b> | <b>0.8988</b> | <b>0.9324</b> | <b>0.8958</b> | 0.5632        |               |

Table 1. Comparison of the performance between our proposed method and various sizes of the YOLOv5 [2] models. Each model is evaluated on the combined datasets of SUN [6], KUMC [5], and Kvasir [1]. The best scores are bold-faced.

| # Fold | Model        | SUN           |               |               |               |               |               | KUMC          |               |               |               |               |               | Kvasir        |               |               |               |               |               |
|--------|--------------|---------------|---------------|---------------|---------------|---------------|---------------|---------------|---------------|---------------|---------------|---------------|---------------|---------------|---------------|---------------|---------------|---------------|---------------|
|        |              | Precision     | Recall        | F1            | mAP25         | mAP50         | mAP50-95      | Precision     | Recall        | F1            | mAP25         | mAP50         | mAP50-95      | Precision     | Recall        | F1            | mAP25         | mAP50         | mAP50-95      |
| 1      | YOLOv5m      | 0.9684        | 0.9030        | 0.9346        | 0.9516        | 0.9416        | <b>0.6043</b> | 0.9543        | <b>0.8786</b> | 0.9149        | 0.9337        | 0.9185        | 0.6319        | 0.9520        | 0.8894        | 0.9197        | 0.9430        | 0.9182        | 0.6748        |
|        | ENDOMIND     | 0.9679        | 0.8846        | 0.9244        | 0.9496        | 0.9358        | 0.5849        | 0.9380        | 0.8621        | 0.8985        | 0.9240        | 0.9077        | 0.6194        | <b>0.9651</b> | 0.8894        | <b>0.9257</b> | <b>0.9557</b> | 0.9213        | 0.6835        |
|        | YOLOv5m-Tiny | 0.9476        | 0.8852        | 0.9153        | 0.9470        | 0.9351        | 0.5658        | 0.9538        | 0.8700        | 0.9100        | 0.9282        | 0.9121        | 0.6247        | 0.9440        | 0.8819        | 0.9172        | 0.9500        | <b>0.9227</b> | <b>0.6883</b> |
|        | YOLOv5m-TST  | <b>0.9712</b> | <b>0.9286</b> | <b>0.9494</b> | <b>0.9737</b> | <b>0.9659</b> | 0.5986        | <b>0.9607</b> | 0.8785        | <b>0.9178</b> | <b>0.9349</b> | <b>0.9219</b> | <b>0.6366</b> | 0.9038        | <b>0.8990</b> | 0.9014        | 0.9485        | 0.9185        | 0.6819        |
| 2      | YOLOv5m      | <b>0.9124</b> | 0.8381        | 0.8737        | 0.9149        | 0.8779        | <b>0.5160</b> | 0.8914        | 0.8298        | 0.8595        | 0.9132        | 0.8713        | 0.5697        | 0.9119        | 0.8738        | 0.8925        | 0.9282        | 0.8862        | 0.6233        |
|        | ENDOMIND     | 0.8999        | 0.8605        | <b>0.8798</b> | 0.9149        | 0.8726        | 0.4981        | 0.9013        | 0.8013        | 0.8484        | 0.8900        | 0.8360        | 0.5298        | 0.9053        | <b>0.8937</b> | 0.8995        | 0.9328        | 0.9054        | 0.6562        |
|        | YOLOv5m-Tiny | 0.9193        | 0.8644        | 0.8910        | 0.9233        | 0.8994        | 0.5382        | 0.8821        | <b>0.8544</b> | <b>0.8680</b> | <b>0.9288</b> | <b>0.8720</b> | <b>0.5813</b> | 0.8962        | 0.8875        | 0.8918        | 0.9322        | 0.8879        | 0.6469        |
|        | YOLOv5m-TST  | 0.9120        | <b>0.8406</b> | <b>0.8746</b> | <b>0.9200</b> | <b>0.8827</b> | 0.4982        | <b>0.9038</b> | 0.8207        |               |               |               |               |               |               |               |               |               |               |

| # Fold      | Model         | 320           |               |               |               |               | 384           |               |               |               |               | 480           |               |               |               |               |               |               |               |
|-------------|---------------|---------------|---------------|---------------|---------------|---------------|---------------|---------------|---------------|---------------|---------------|---------------|---------------|---------------|---------------|---------------|---------------|---------------|---------------|
|             |               | Precision     | Recall        | F1            | mAP25         | mAP50         | mAP50:95      | Precision     | Recall        | F1            | mAP25         | mAP50         | mAP50:95      | Precision     | Recall        | F1            | mAP25         | mAP50         | mAP50:95      |
| 1           | YOLOv3        | 0.9652        | 0.9316        | 0.9481        | 0.9743        | 0.9665        | <b>0.6782</b> | <b>0.9756</b> | 0.9354        | <b>0.9551</b> | 0.9767        | <b>0.9701</b> | <b>0.6928</b> | <b>0.9705</b> | 0.9365        | <b>0.9532</b> | <b>0.9775</b> | <b>0.9704</b> | <b>0.6944</b> |
|             | YOLOv3-TST    | <b>0.9667</b> | <b>0.9383</b> | <b>0.9523</b> | <b>0.9761</b> | <b>0.9684</b> | 0.6750        | 0.9665        | <b>0.9439</b> | 0.9551        | <b>0.9778</b> | 0.9693        | 0.6768        | 0.9664        | <b>0.9371</b> | 0.9515        | 0.9733        | 0.9667        | 0.6701        |
|             | YOLOv8m       | 0.9616        | <b>0.9348</b> | <b>0.9480</b> | <b>0.9728</b> | <b>0.9661</b> | <b>0.6774</b> | 0.9650        | 0.9232        | 0.9437        | 0.9717        | 0.9642        | <b>0.6845</b> | <b>0.9689</b> | 0.9167        | 0.9421        | 0.9664        | 0.9606        | 0.6820        |
|             | YOLOv8m-TST   | <b>0.9691</b> | 0.9238        | 0.9459        | 0.9706        | 0.9636        | 0.6664        | <b>0.9666</b> | <b>0.9374</b> | <b>0.9518</b> | <b>0.9760</b> | <b>0.9669</b> | 0.6742        | 0.9666        | <b>0.9361</b> | <b>0.9511</b> | <b>0.9760</b> | <b>0.9680</b> | <b>0.6824</b> |
|             | YOLOv5m       | <b>0.9636</b> | 0.8941        | 0.9275        | 0.9457        | 0.9318        | 0.6010        | <b>0.9686</b> | 0.9028        | 0.9345        | 0.9494        | 0.9409        | <b>0.6246</b> | <b>0.9715</b> | 0.8972        | 0.9329        | 0.9513        | 0.9403        | <b>0.6177</b> |
| YOLOv5m-TST | 0.9623        | <b>0.9135</b> | <b>0.9373</b> | <b>0.9590</b> | <b>0.9488</b> | <b>0.6124</b> | 0.9553        | <b>0.9153</b> | <b>0.9349</b> | <b>0.9580</b> | <b>0.9486</b> | 0.6130        | 0.9647        | <b>0.9170</b> | <b>0.9403</b> | <b>0.9598</b> | <b>0.9512</b> | 0.6164        |               |
| 2           | YOLOv3        | 0.9214        | <b>0.8855</b> | <b>0.9031</b> | 0.9488        | 0.9103        | <b>0.6034</b> | <b>0.9298</b> | <b>0.9056</b> | <b>0.9176</b> | <b>0.9593</b> | <b>0.9227</b> | <b>0.6134</b> | <b>0.9298</b> | <b>0.8954</b> | <b>0.9123</b> | <b>0.9586</b> | <b>0.9235</b> | <b>0.6130</b> |
|             | YOLOv3-TST    | <b>0.9262</b> | 0.8768        | 0.9008        | <b>0.9496</b> | <b>0.9114</b> | 0.5891        | 0.9259        | 0.8807        | 0.9027        | 0.9446        | 0.9057        | 0.5915        | 0.9219        | 0.8896        | 0.9055        | 0.9504        | 0.9131        | 0.5971        |
|             | YOLOv8m       | 0.9189        | 0.8550        | 0.8858        | 0.9348        | <b>0.8991</b> | <b>0.6025</b> | <b>0.9308</b> | 0.8494        | 0.8883        | 0.9305        | 0.8955        | <b>0.6053</b> | <b>0.9362</b> | 0.8672        | 0.9004        | 0.9420        | <b>0.9117</b> | <b>0.6090</b> |
|             | YOLOv8m-TST   | <b>0.9244</b> | <b>0.8748</b> | <b>0.8989</b> | <b>0.9422</b> | 0.8972        | 0.5752        | 0.9219        | <b>0.8868</b> | <b>0.9040</b> | <b>0.9481</b> | <b>0.9096</b> | 0.5915        | 0.9230        | <b>0.8888</b> | <b>0.9056</b> | <b>0.9524</b> | 0.9116        | 0.5907        |
|             | YOLOv5m       | <b>0.9316</b> | 0.8309        | 0.8784        | 0.9069        | 0.8672        | <b>0.5334</b> | <b>0.9334</b> | 0.8222        | 0.8743        | 0.9064        | 0.8670        | <b>0.5415</b> | <b>0.9341</b> | 0.8590        | <b>0.8950</b> | <b>0.9301</b> | <b>0.8897</b> | <b>0.5569</b> |
| YOLOv5m-TST | 0.9244        | <b>0.8607</b> | <b>0.8914</b> | <b>0.9256</b> | <b>0.8777</b> | 0.5262        | 0.9130        | <b>0.8686</b> | <b>0.8902</b> | <b>0.9285</b> | <b>0.8897</b> | 0.5406        | 0.9246        | <b>0.8622</b> | 0.8923        | 0.9280        | 0.8877        | 0.5482        |               |
| 3           | YOLOv3        | <b>0.9136</b> | <b>0.9097</b> | <b>0.9117</b> | 0.9531        | 0.9144        | <b>0.6078</b> | <b>0.9208</b> | <b>0.9129</b> | <b>0.9168</b> | 0.9549        | 0.9128        | 0.6063        | <b>0.9351</b> | 0.8819        | 0.9077        | 0.9513        | 0.9228        | <b>0.6282</b> |
|             | YOLOv3-TST    | 0.9117        | 0.8976        | 0.9046        | <b>0.9541</b> | <b>0.9185</b> | 0.5970        | 0.9108        | 0.9075        | 0.9092        | <b>0.9558</b> | <b>0.9203</b> | <b>0.6127</b> | 0.9225        | <b>0.9066</b> | <b>0.9145</b> | <b>0.9577</b> | <b>0.9230</b> | 0.6098        |
|             | YOLOv8m       | <b>0.9134</b> | 0.8778        | 0.8952        | 0.9382        | 0.8940        | <b>0.5931</b> | 0.9155        | <b>0.8903</b> | 0.9028        | 0.9483        | 0.9057        | <b>0.6047</b> | 0.9148        | 0.8827        | 0.8985        | <b>0.9494</b> | <b>0.9109</b> | <b>0.6052</b> |
|             | YOLOv8m-TST   | 0.9112        | <b>0.8890</b> | <b>0.9000</b> | <b>0.9492</b> | <b>0.9107</b> | 0.5904        | <b>0.9214</b> | <b>0.8960</b> | <b>0.9034</b> | <b>0.9511</b> | <b>0.9100</b> | 0.5952        | <b>0.9148</b> | <b>0.8896</b> | <b>0.9020</b> | 0.9457        | 0.9062        | 0.5976        |
|             | YOLOv5m       | 0.9158        | 0.8538        | 0.8837        | 0.9226        | 0.8757        | <b>0.5386</b> | <b>0.9229</b> | 0.8542        | <b>0.8872</b> | 0.9173        | 0.8688        | <b>0.5316</b> | <b>0.9326</b> | 0.8491        | <b>0.8889</b> | 0.9261        | 0.8715        | 0.5407        |
| YOLOv5m-TST | <b>0.9257</b> | <b>0.8736</b> | <b>0.8989</b> | <b>0.9330</b> | <b>0.8866</b> | 0.5288        | 0.8993        | <b>0.8657</b> | <b>0.8822</b> | <b>0.9241</b> | <b>0.8768</b> | 0.5310        | 0.9137        | <b>0.8634</b> | <b>0.8878</b> | <b>0.9297</b> | <b>0.8918</b> | <b>0.5477</b> |               |
| 4           | YOLOv3        | 0.9203        | 0.8336        | 0.8748        | 0.9205        | 0.8987        | <b>0.5944</b> | <b>0.9179</b> | 0.8315        | 0.8726        | 0.9235        | 0.8990        | <b>0.5874</b> | <b>0.9239</b> | 0.8451        | 0.8827        | 0.9334        | 0.9105        | <b>0.5988</b> |
|             | YOLOv3-TST    | <b>0.9204</b> | <b>0.8711</b> | <b>0.8951</b> | <b>0.9416</b> | <b>0.9120</b> | 0.5856        | 0.9200        | <b>0.8617</b> | <b>0.8814</b> | <b>0.9339</b> | <b>0.9080</b> | 0.5857        | 0.9151        | <b>0.8702</b> | <b>0.8921</b> | <b>0.9392</b> | <b>0.9150</b> | 0.5808        |
|             | YOLOv8m       | <b>0.9406</b> | 0.8419        | <b>0.8885</b> | <b>0.9320</b> | <b>0.9087</b> | <b>0.5932</b> | 0.9211        | 0.8285        | 0.8723        | 0.9188        | 0.8944        | <b>0.5864</b> | <b>0.9256</b> | 0.8442        | 0.8830        | 0.9311        | 0.9029        | <b>0.5903</b> |
|             | YOLOv8m-TST   | 0.9136        | <b>0.8420</b> | 0.8763        | 0.9317        | 0.8992        | 0.5701        | <b>0.9358</b> | <b>0.8391</b> | <b>0.8848</b> | <b>0.9356</b> | <b>0.9060</b> | 0.5715        | 0.9124        | <b>0.8625</b> | <b>0.8868</b> | <b>0.9380</b> | <b>0.9098</b> | 0.5761        |
|             | YOLOv5m       | 0.9170        | 0.7878        | 0.8475        | 0.8811        | 0.8372        | 0.5166        | <b>0.9240</b> | 0.8017        | 0.8586        | 0.8928        | 0.8554        | 0.5197        | 0.9136        | 0.8048        | 0.8558        | 0.8952        | 0.8605        | 0.5328        |
| YOLOv5m-TST | <b>0.9193</b> | <b>0.8294</b> | <b>0.8720</b> | <b>0.9108</b> | <b>0.8717</b> | <b>0.5206</b> | 0.9238        | <b>0.8529</b> | <b>0.8869</b> | <b>0.9200</b> | <b>0.8822</b> | <b>0.5341</b> | <b>0.9186</b> | <b>0.8420</b> | <b>0.8786</b> | <b>0.9192</b> | <b>0.8810</b> | <b>0.5349</b> |               |
| 5           | YOLOv3        | <b>0.9505</b> | 0.8373        | 0.8903        | 0.9224        | 0.8885        | <b>0.6011</b> | <b>0.9548</b> | <b>0.8595</b> | <b>0.9046</b> | 0.9311        | 0.8939        | <b>0.6052</b> | <b>0.9576</b> | 0.8426        | 0.8964        | 0.9191        | 0.8875        | <b>0.6137</b> |
|             | YOLOv3-TST    | 0.9484        | <b>0.8526</b> | <b>0.8980</b> | <b>0.9286</b> | <b>0.8945</b> | 0.6001        | 0.9526        | 0.8570        | 0.9023        | <b>0.9372</b> | <b>0.9080</b> | 0.5967        | 0.9450        | <b>0.8735</b> | <b>0.9078</b> | <b>0.9435</b> | <b>0.9109</b> | 0.6035        |
|             | YOLOv8m       | <b>0.9477</b> | 0.8162        | 0.8771        | 0.9037        | 0.8705        | <b>0.5934</b> | 0.9431        | 0.8221        | 0.8784        | 0.9122        | 0.8747        | 0.5993        | <b>0.9537</b> | 0.8308        | 0.8881        | 0.9177        | 0.8848        | <b>0.6079</b> |
|             | YOLOv8m-TST   | 0.9395        | <b>0.8582</b> | <b>0.8970</b> | <b>0.9363</b> | <b>0.8987</b> | 0.5933        | <b>0.9445</b> | <b>0.8745</b> | <b>0.9034</b> | <b>0.9429</b> | <b>0.9060</b> | <b>0.6020</b> | 0.9468        | <b>0.8464</b> | <b>0.8938</b> | <b>0.9286</b> | <b>0.8942</b> | 0.6020        |
|             | YOLOv5m       | 0.9231        | 0.7978        | 0.8559        | 0.8846        | 0.8443        | 0.5303        | <b>0.9533</b> | 0.8065        | 0.8738        | 0.8929        | 0.8572        | <b>0.5424</b> | 0.9388        | 0.8135        | 0.8717        | <b>0.9050</b> | <b>0.8625</b> | 0.5471        |
| YOLOv5m-TST | <b>0.9364</b> | <b>0.8365</b> | <b>0.8837</b> | <b>0.9076</b> | <b>0.8661</b> | <b>0.5348</b> | 0.9366        | <b>0.8285</b> | <b>0.8792</b> | <b>0.9062</b> | <b>0.8610</b> | 0.5354        | <b>0.9544</b> | <b>0.8168</b> | <b>0.8802</b> | 0.8957        | 0.8567        | <b>0.5538</b> |               |
| Avg.        | YOLOv3        | 0.9342        | 0.8795        | 0.9056        | 0.9438        | 0.9157        | <b>0.6170</b> | <b>0.9398</b> | 0.8890        | <b>0.9133</b> | 0.9491        | 0.9197        | <b>0.6210</b> | <b>0.9434</b> | 0.8803        | 0.9105        | 0.9480        | 0.9229        | <b>0.6296</b> |
|             | YOLOv3-TST    | <b>0.9347</b> | <b>0.8873</b> | <b>0.9102</b> | <b>0.9500</b> | <b>0.9210</b> | 0.6093        | 0.9316        | 0.8992        | 0.9101        | <b>0.9499</b> | <b>0.9204</b> | 0.6127        | 0.9342        | <b>0.8954</b> | <b>0.9143</b> | <b>0.9528</b> | <b>0.9257</b> | 0.6123        |
|             | YOLOv8m       | <b>0.9365</b> | 0.8651        | 0.8989        | 0.9363        | 0.9077        | <b>0.6119</b> | 0.9351        | 0.8627        | 0.8971        | 0.9363        | 0.9069        | <b>0.6161</b> | <b>0.9398</b> | 0.8683        | 0.9024        | 0.9413        | 0.9142        | <b>0.6189</b> |
|             | YOLOv8m-TST   | 0.9316        | <b>0.8775</b> | <b>0.9036</b> | <b>0.9460</b> | <b>0.9139</b> | 0.5991        | <b>0.9381</b> | <b>0.8848</b> | <b>0.9104</b> | <b>0.9507</b> | <b>0.9197</b> | 0.6069        | 0.9327        | <b>0.8847</b> | <b>0.9078</b> | <b>0.9481</b> | <b>0.9180</b> | 0.6097        |
|             | YOLOv5m       | 0.9302        | 0.8329        | 0.8786        | 0.9082        | 0.8712        | 0.5440        | <b>0.9404</b> | 0.8375        | 0.8857        | 0.9118        | 0.8779        | <b>0.5520</b> | <b>0.9381</b> | 0.8447        | 0.8889        | 0.9215        | 0.8849        | 0.5590        |
| YOLOv5m-TST | <b>0.9336</b> | <b>0.8627</b> | <b>0.8967</b> | <b>0.9272</b> | <b>0.8902</b> | <b>0.5446</b> | 0.9256        | <b>0.8662</b> | <b>0.8947</b> | <b>0.9274</b> | <b>0.8917</b> | 0.5508        | 0.9352        | <b>0.8603</b> | <b>0.8958</b> | <b>0.9265</b> | <b>0.8937</b> | <b>0.5602</b> |               |

Table 3. Comparison of the performance between our proposed method applied to YOLOv3 [8] and YOLOv8m [3] for examining the compatibility of the model. Each model is evaluated on the combined datasets of SUN [6], KUMC [5], and Kvasir [1]. The best scores are bold-faced.

| # Fold | Key Dim. | 320           |               |               |               |               |               |
|--------|----------|---------------|---------------|---------------|---------------|---------------|---------------|
|        |          | Precision     | Recall        | F1            | mAP25         | mAP50         | mAP50:95      |
| 1      | 4        | 0.9623        | <i>0.9135</i> | <i>0.9373</i> | 0.9590        | 0.9488        | 0.6124        |
|        | 64       | <i>0.9688</i> | <b>0.9216</b> | <b>0.9446</b> | <b>0.9646</b> | <b>0.9561</b> | <b>0.6247</b> |
|        | 128      | 0.9617        | <i>0.9133</i> | <i>0.9369</i> | 0.9616        | <i>0.9513</i> | <i>0.6183</i> |
|        | 256      | <b>0.9712</b> | 0.9083        | <i>0.9387</i> | <i>0.9637</i> | <i>0.9554</i> | <i>0.6232</i> |
|        | YOLOv5m  | <u>0.9636</u> | 0.8941        | 0.9275        | 0.9457        | 0.9318        | 0.6010        |
| 2      | 4        | 0.9244        | 0.8607        | 0.8914        | 0.9256        | 0.8777        | 0.5262        |
|        | 64       | <u>0.9279</u> | <b>0.8666</b> | <b>0.8962</b> | <i>0.9359</i> | <i>0.8948</i> | <b>0.5511</b> |
|        | 128      | <i>0.9283</i> | <i>0.8626</i> | <i>0.8942</i> | <b>0.9378</b> | <b>0.8958</b> | <u>0.5452</u> |
|        | 256      | 0.9274        | <i>0.8665</i> | <i>0.8959</i> | <i>0.9321</i> | <i>0.8906</i> | <i>0.5466</i> |
|        | YOLOv5m  | <b>0.9316</b> | 0.8309        | 0.8784        | 0.9069        | 0.8672        | 0.5334        |
| 3      | 4        | 0.9257        | 0.8736        | 0.8989        | 0.9330        | 0.8866        | 0.5288        |
|        | 64       | <i>0.9221</i> | <i>0.8778</i> | <i>0.8994</i> | <i>0.9412</i> | <i>0.8955</i> | <i>0.5516</i> |
|        | 128      | <b>0.9298</b> | <i>0.8782</i> | <b>0.9033</b> | <b>0.9469</b> | <b>0.9029</b> | <b>0.5546</b> |
|        | 256      | <i>0.9220</i> | <b>0.8793</b> | <i>0.9002</i> | <i>0.9435</i> | <i>0.9028</i> | <i>0.5531</i> |
|        | YOLOv5m  | 0.9158        | 0.8538        | 0.8837        | 0.9226        | 0.8757        | 0.5386        |
| 4      | 4        | <i>0.9193</i> | <i>0.8294</i> | <i>0.8720</i> | <i>0.9108</i> | <i>0.8717</i> | 0.5206        |
|        | 64       | <i>0.9182</i> | <i>0.8389</i> | <i>0.8768</i> | <i>0.9137</i> | <b>0.8795</b> | <b>0.5320</b> |
|        | 128      | 0.9147        | 0.8265        | 0.8684        | 0.9070        | 0.8663        | <u>0.5230</u> |
|        | 256      | <b>0.9243</b> | <b>0.8398</b> | <b>0.8800</b> | <b>0.9153</b> | <i>0.8775</i> | <i>0.5286</i> |
|        | YOLOv5m  | 0.9170        | 0.7878        | 0.8475        |               |               |               |

## References

- [1] Debesh Jha, Pia H Smedsrud, Michael A Riegler, Pål Halvorsen, Thomas de Lange, Dag Johansen, and Håvard D Johansen. Kvasir-seg: A segmented polyp dataset. In *MultiMedia Modeling: 26th International Conference, MMM 2020, Daejeon, South Korea, January 5–8, 2020, Proceedings, Part II* 26, pages 451–462. Springer, 2020. [1](#), [2](#), [3](#), [4](#)
- [2] Glenn Jocher. Ultralytics yolov5, 2020. [1](#), [2](#), [3](#), [4](#)
- [3] Glenn Jocher, Ayush Chaurasia, and Jing Qiu. Ultralytics yolov8, 2023. [3](#), [4](#)
- [4] Adrian Krenzer, Michael Banck, Kevin Makowski, Amar Hekalo, Daniel Fitting, Joel Troya, Boban Sudarevic, Wolfgang G Zoller, Alexander Hann, and Frank Puppe. A real-time polyp-detection system with clinical application in colonoscopy using deep convolutional neural networks. *Journal of Imaging*, 9(2):26, 2023. [3](#)
- [5] Kaidong Li, Mohammad I Fathan, Krushi Patel, Tianxiao Zhang, Cuncong Zhong, Ajay Bansal, Amit Rastogi, Jean S Wang, and Guanghui Wang. Colonoscopy polyp detection and classification: Dataset creation and comparative evaluations. *Plos one*, 16(8):e0255809, 2021. [1](#), [2](#), [3](#), [4](#)
- [6] Masashi Misawa, Shin-ei Kudo, Yuichi Mori, Kinichi Hotta, Kazuo Ohtsuka, Takahisa Matsuda, Shoichi Saito, Toyoki Kudo, Toshiyuki Baba, Fumio Ishida, et al. Development of a computer-aided detection system for colonoscopy and a publicly accessible large colonoscopy video database (with video). *Gastrointestinal endoscopy*, 93(4):960–967, 2021. [1](#), [3](#), [4](#)
- [7] Shimin Ou, Yixing Gao, Zebin Zhang, and Chenjian Shi. Polyp-yolov5-tiny: A lightweight model for real-time polyp detection. In *2021 IEEE 2nd International Conference on Information Technology, Big Data and Artificial Intelligence (ICIBA)*, volume 2, pages 1106–1111. IEEE, 2021. [3](#)
- [8] Joseph Redmon and Ali Farhadi. Yolov3: An incremental improvement. *arXiv preprint arXiv:1804.02767*, 2018. [3](#), [4](#)
